# Supplementary material
Source: PubMed Central journal article supplement (PMC8440392)
Supplement: NIHMS1725161-supplement-1.pdf [file NIHMS1725161-supplement-1.pdf]

## Supplementary Figure for

# Vaccine nanodiscs plus polyI:CLC elicit robust CD8<sup>+</sup> T cell responses in mice and non-human primates.

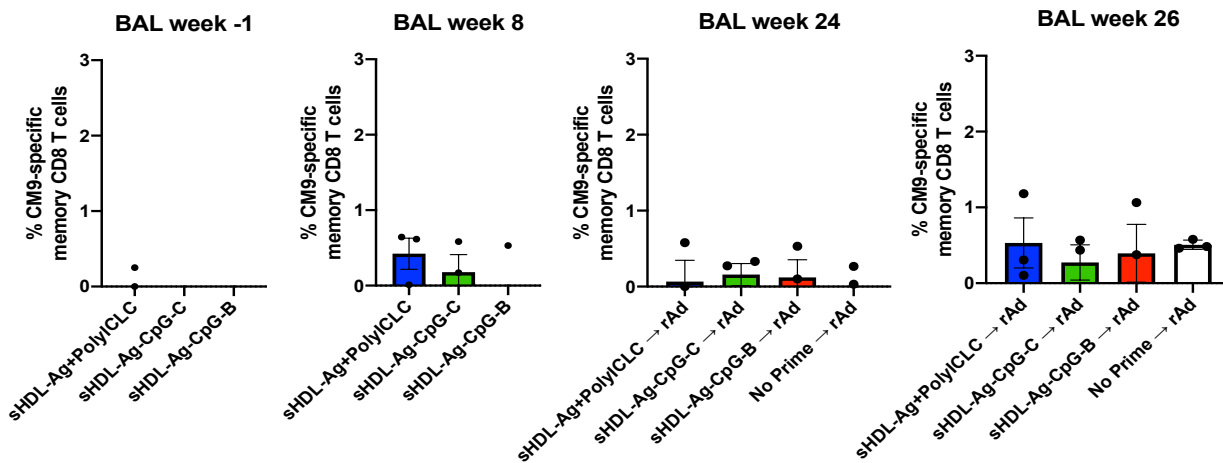

**Supplementary Figure 1. CM9-specific memory CD8<sup>+</sup> T cell responses in NHPs.** *Mamu-A\*01* rhesus macaques were immunized as described in **Figure 7A**. Shown are CM9-specific memory CD8<sup>+</sup> T cell responses in BAL tissues on week -1, 8, 24, and 26, as measured by intracellular cytokine staining.
